# Supplementary material for: Long-term exposure to fine particulate matter and incidence of type 2 diabetes mellitus in a cohort study: effects of total and traffic-specific air pollution
Source: Springer Nature journal article supplement (doi:10.1186/s12940-015-0031-x), 2015-06-18
Supplement: MOESM1 [file 12940_2015_31_MOESM1_ESM.pdf]

# Additional File 1

## **Long-term exposure to fine particulate matter and incidence of type 2 diabetes mellitus: Effects of total and traffic-specific air pollution**

Gudrun Weinmayr<sup>1,2</sup>, Frauke Hennig<sup>1</sup>, Kateryna Fuks<sup>1</sup>, Michael Nonnemacher<sup>3</sup>, Hermann Jakobs<sup>4</sup>, Stefan Möhlenkamp<sup>5</sup>, Raimund Erbel<sup>5</sup>, Karl-Heinz Jöckel<sup>3</sup>, Barbara Hoffmann<sup>1,2&</sup>, Susanne Moebus<sup>3&</sup> on behalf of the Heinz Nixdorf Recall Investigator Group

1 IUF - Leibniz Research Institute for Environmental Medicine, Düsseldorf

2 Medical School, Heinrich Heine University of Düsseldorf, Düsseldorf, Germany

3 Institute for Medical Informatics, Biometry and Epidemiology, University Hospital of Essen, University of Duisburg-Essen

4 Rhenish Institute for Environmental Research at the University of Cologne

5 Department of Cardiology, West German Heart Centre of Essen, University of Duisburg-Essen

& B.H. and S.M. contributed equally to last authorship

Address for correspondence:

Gudrun Weinmayr

E-Mail: [gudrun.weinmayr@uni-duesseldorf.de](mailto:gudrun.weinmayr@uni-duesseldorf.de), [gudrun.weinmayr@uni-ulm.de](mailto:gudrun.weinmayr@uni-ulm.de)

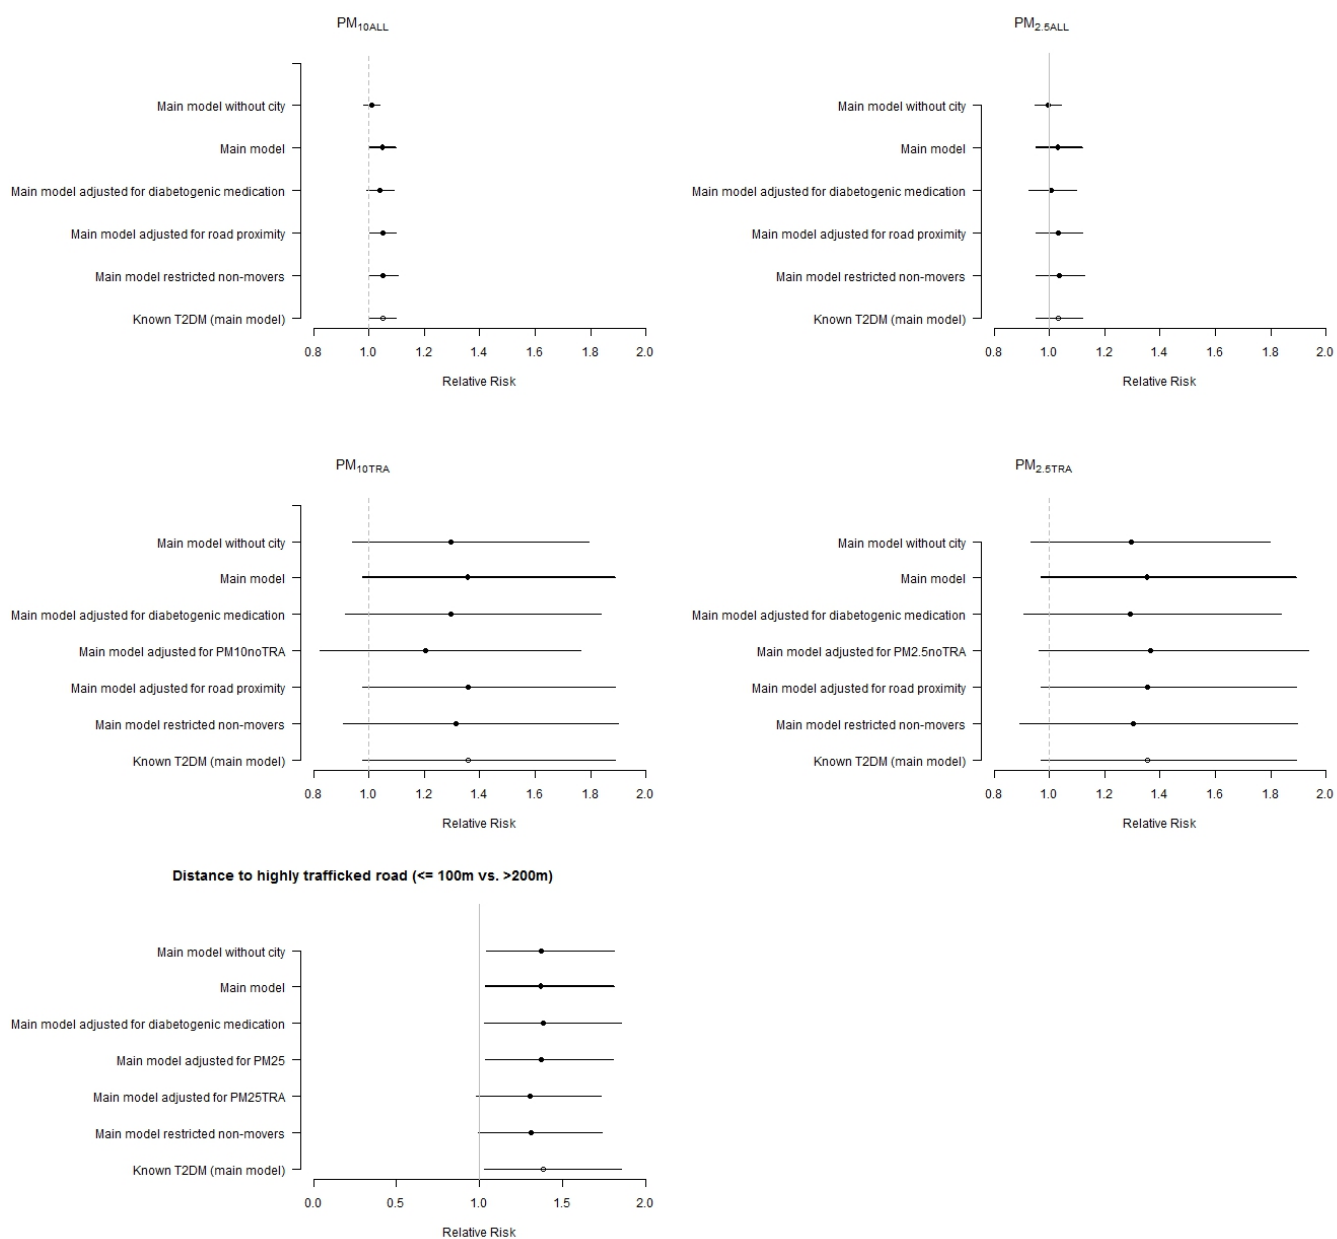

**addFig.1.** Relative risks (RR) for an increase of  $1\mu\text{g}/\text{m}^3$  with 95% confidence intervals from different adjustment sets:  
 Main model: adjusted for sex, age, BMI, lifestyle, individual SES, neighborhood unemployment rate and city (N=3607)  
 Known T2DM: outcome based on self-reported physician diagnosed T2DM or intake of medication for T2DM (N=3372)  
 Main Model restricted to movers is based on 3006 participants, all other models (except Known T2DM) on 3607 participants.

**addTable 1:** Distributions of particulate matter (PM<sub>2.5</sub>, PM<sub>10</sub>) in the study population (N=3607).

|                                         | Annual mean<br>2001-2002        | Mean  | SD   | Min   | Q1    | Q3    | Max   | IQR   | Correlation coefficient (Pearson) |                      |                       |                       |
|-----------------------------------------|---------------------------------|-------|------|-------|-------|-------|-------|-------|-----------------------------------|----------------------|-----------------------|-----------------------|
|                                         |                                 |       |      |       |       |       |       |       | PM <sub>10</sub> ALL              | PM <sub>10</sub> TRA | PM <sub>2.5</sub> ALL | PM <sub>2.5</sub> TRA |
| PM <sub>10</sub> (µg/m <sup>3</sup> )   | Total (PM <sub>10</sub> ALL)    | 20.80 | 2.35 | 17.1  | 18.71 | 22.49 | 28.21 | 3.78  | 1                                 |                      |                       |                       |
|                                         | Traffic (PM <sub>10</sub> TRA)  | 0.83  | 0.24 | 0.24  | 0.64  | 0.97  | 1.69  | 0.33  | 0.52                              | 1                    |                       |                       |
| PM <sub>2.5</sub> (µg/m <sup>3</sup> )  | Total (PM <sub>2.5</sub> ALL)   | 16.74 | 1.44 | 14.16 | 15.54 | 17.83 | 20.95 | 2.29  | 0.88                              | 0.39                 | 1                     |                       |
|                                         | Traffic (PM <sub>2.5</sub> TRA) | 0.83  | 0.24 | 0.26  | 0.65  | 0.97  | 1.66  | 0.32  | 0.51                              | 1.00                 | 0.38                  | 1                     |
| Distance to major road <sup>a</sup> (m) |                                 | 1,022 | 807  | 1     | 412   | 1,433 | 4,877 | 1,021 | -0.26                             | -0.45                | -0.12                 | -0.45                 |

Q1 and Q3 = upper limit of 1<sup>st</sup> and 3<sup>rd</sup> quartile, respectively, IQR = interquartile range, a: major road is defined as a road with more than 26,062 vehicles/day
